# Supplementary material for: Cellular senescence in malignant cells promotes tumor progression in mouse and patient Glioblastoma
Source: PubMed Central journal article supplement (PMC9883514; doi:10.1038/s41467-023-36124-9), 2023-01-27
Supplement: 41467_2023_36124_MOESM3_ESM.pdf [file 41467_2023_36124_MOESM3_ESM.pdf]

## Description of Additional Supplementary Files

### Supplementary Data 1

#### Description:

- Gene lists used for GSEA
- MSigDB Gene lists used for GSEA
- FACs strategy. First, cells were selected from cellular debris based on the FSC area/SSC area; then singlets were selected based on the FSC area/ FSCHeight and FSC area / FSC weight. Finally, live cells were selected as negative for the Fixable Viability Dye Fluor. This last gating was determined with cells non-incubated with Fixable Viability Dye. (Related to Fig. 3b)

### Supplementary Data 2

#### Description:

- Selected differentially expressed genes in CD45+ cells from p16-3MR-GBMs (pct.1) compared to WT+GCV GBMs (pct.2) (Early time point /10X scRNAseq/related to Fig. 4f) Statistical significance of the expression of genes in p16-3MR+GCV compared with WT+GCV clusters was determined by Wilcoxon-Mann-Whitney test (ns, not significant, \*,  $p < 0.05$ ; \*\*,  $p < 0.01$ ; \*\*\*,  $p < 0.001$ ).
- *p16<sup>Ink4a</sup>* fold change per CD45+ cluster in p16-3MR+GCV GBMs (pct.1) compared with WT+GCV GBMs (pct.2) (related to Fig.3h)

### Supplementary Data 3

#### Description:

- Differentially downregulated genes in the p16-3MR+GCV vs the WT+GCV astrocyte cluster (Early time point/10X scRNAseq) avg-logFC  $\leq -0.25$ ; FDR  $\leq 0.05$  (related to Fig.5)
- Differentially upregulated genes in p16<sup>Ink4a</sup> positive vs p16<sup>Ink4a</sup> negative malignant cells (Late timepoint/ddSeq scRNAseq) avg-logFC  $\geq 0.25$ ; FDR  $\leq 0.05$  (related to Fig.5)
- Differentially down-regulated genes in the p16-3MR+GCV vs the WT+GCV GBMs (Late time point/Bulk RNAseq) avg-logFC  $\leq -0.5$ ; FDR  $\leq 0.05$  (related to Fig.5)
- NRF2 putative targets (related to Fig. 5)

### Supplementary Data 4

#### Description:

- Univariate Cox analysis (related to Fig.7)
- Cox proportional hazards assumption (related to Fig.7)

### Supplementary Data 5

#### Description:

- Antibodies for IHC/IF analysis
- Antibodies for WB analysis
- RT-qPCR primers
- miR oligonucleotides
- Suppliers for compounds
